# Supplementary material
Source: Royal Society of Chemistry journal article supplement (doi:10.1039/d6cy00551a)
Supplement: d6cy00551a1.pdf [file d6cy00551a1.pdf]

# Supporting Information

## Robust low-temperature microwave catalytic direct dehydrogenation of propane to propylene over Pt-Co/SiBeta+SiC

**Qin Zhao,<sup>a†</sup> Ruize Sun,<sup>a†</sup> Xiaonan Liu,<sup>a</sup> Lexi Tang,<sup>a</sup> Jingge Chen,<sup>a</sup> Jicheng Zhou,<sup>ab</sup> and Wentao Xu<sup>\*ab</sup>**

<sup>a</sup>Key Laboratory of Green Catalysis and Chemical Reaction Engineering of Hunan Province, School of Chemical Engineering, Xiangtan University, Xiangtan 411105, China;

<sup>b</sup>National and Local United Engineering Research Center for Chemical Process Simulation and Intensification, Xiangtan University, Xiangtan 411105, China;

<sup>†</sup>We are co-first authors who contributed equally to this work.

<sup>\*</sup>Corresponding author. Tel: 13973218371, E-mail: [wentaoxu@xtu.edu.cn](mailto:wentaoxu@xtu.edu.cn)

Fig. S1 Catalyst preparation diagram.

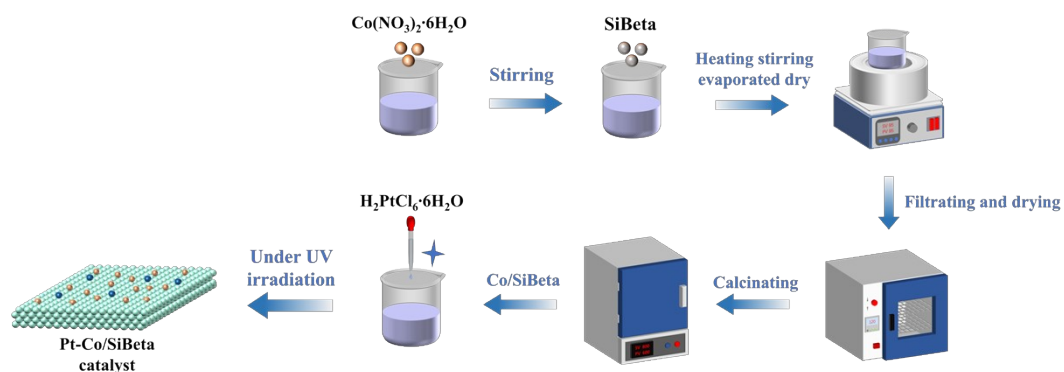

Fig. S1 Preparation diagram of Pt-Co/SiBeta catalyst.

Fig. S2 Device schematic diagram.

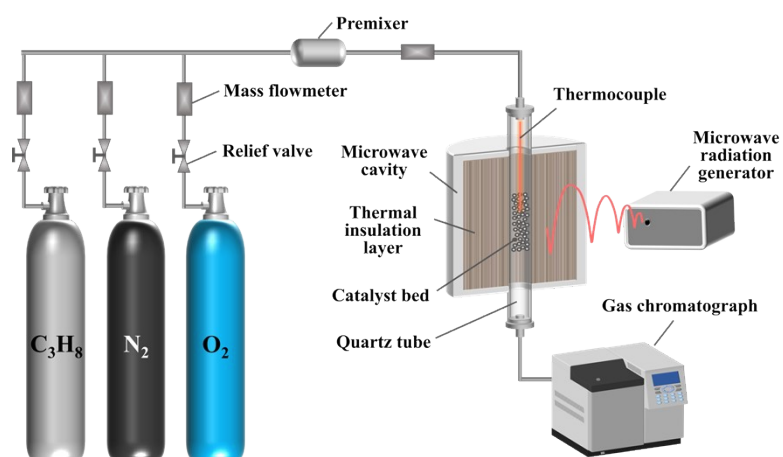

Fig. S2 Schematic diagram of the microwave catalytic reaction device.

**Table S1 Comparison table of C<sub>3</sub>H<sub>8</sub> conversion of different catalysts.**

| Catalysts                                                   | Temperature/°C; Mode     | Conversion C <sub>3</sub> H <sub>8</sub> /% | Selectivity C <sub>3</sub> H <sub>6</sub> /% | References |
|-------------------------------------------------------------|--------------------------|---------------------------------------------|----------------------------------------------|------------|
| Pt-Co/SiBeta+SiC                                            | 450; Microwave Catalysis | 50.4                                        | 97.2                                         | This work  |
| Pt-Co/SiO <sub>2</sub>                                      | 550; Thermal Catalysis   | 25                                          | 96                                           | 18         |
| Co-Sn/NC                                                    | 450; Microwave Catalysis | 15                                          | 75                                           | 31         |
| Pt-Ga@Al <sub>2</sub> O <sub>3</sub>                        | 450; Thermal Catalysis   | 3.6                                         | 91                                           | 55         |
| Pt-Sn/Al <sub>2</sub> O <sub>3</sub>                        | 500; Thermal Catalysis   | 12                                          | 99                                           | 56         |
| Pt-Zn-DeAlBEA                                               | 500; Thermal Catalysis   | 32                                          | 99                                           | 57         |
| CoAl <sub>2</sub> O <sub>4</sub>                            | 550; Thermal Catalysis   | 8                                           | 80                                           | 58         |
| PtY@ZnS-1                                                   | 550; Thermal Catalysis   | 21.4                                        | 98                                           | 59         |
| CoB/SiBEA                                                   | 575; Thermal Catalysis   | 46.6                                        | 99                                           | 60         |
| PtZn-2Ce/MZ                                                 | 580; Thermal Catalysis   | 39                                          | 98                                           | 61         |
| Pt/Ge-MFI                                                   | 585; Thermal Catalysis   | 42                                          | 98                                           | 62         |
| Co/Pt@A                                                     | 590; Thermal Catalysis   | 32.3                                        | 88.8                                         | 63         |
| Co-Al <sub>2</sub> O <sub>3</sub> -HT                       | 590; Thermal Catalysis   | 21.2                                        | 94.6                                         | 64         |
| PtSn/KAl <sub>2</sub> O <sub>3</sub> -Sn(acac) <sub>2</sub> | 600; Thermal Catalysis   | 50.9                                        | 99.5                                         | 65         |
| Co@S-1(EDA)                                                 | 600; Thermal Catalysis   | 30                                          | 92                                           | 66         |
| H-Co@S-1                                                    | 600; Thermal Catalysis   | 41.3                                        | 96.3                                         | 67         |

**Fig. S3 The catalytic performance of SiC under MCRM.**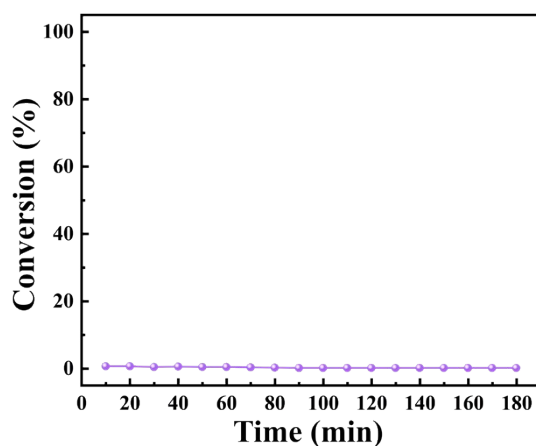**Fig. S3 C<sub>3</sub>H<sub>8</sub> conversion of SiC under MCRM.**

Fig. S4 Linear fitting curve.

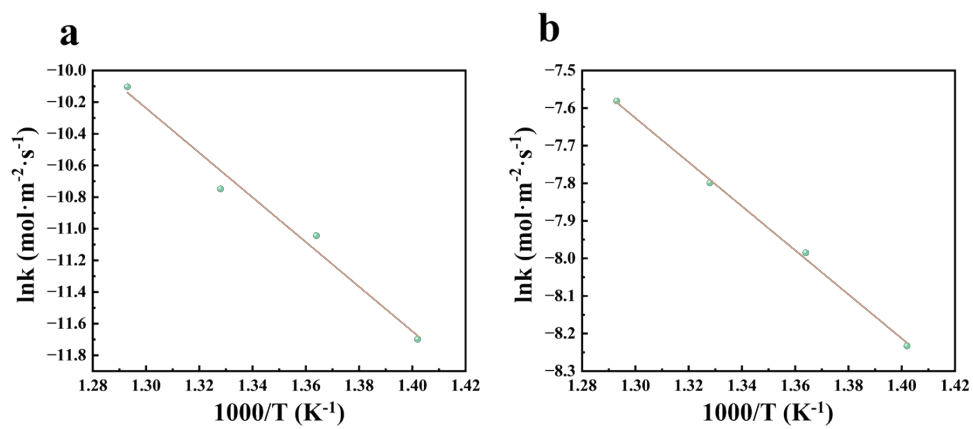

Fig. S4 The linear fitting curves of the PDH reaction of the catalyst under different reaction modes: (a) CRM; (b) MCRM.
